# Supplementary material for: Concentration- and schedule-dependent effects of chemotherapy on the angiogenic potential and drug sensitivity of vascular endothelial cells
Source: PubMed Central journal article supplement (PMC3595478; doi:10.1007/s10456-012-9321-x), 2012-11-10

**Title:** Concentration- and schedule-dependent effects of chemotherapy on the angiogenic potential and drug sensitivity of vascular endothelial cells

**Journal:** Angiogenesis

**Authors:** Eddy Pasquier<sup>1,2</sup>, Maria-Pia Tuset<sup>1</sup>, Janine Street<sup>1</sup>, Snega Sinnappan<sup>1</sup>, Karen MacKenzie<sup>1</sup>, Diane Braguer<sup>3</sup>, Nicolas Andre<sup>2,3,4</sup> and Maria Kavallaris<sup>1,5</sup>

**Affiliations:** 1) Children's Cancer Institute Australia, Lowy Cancer Research Centre, UNSW, Randwick, NSW, Australia

2) Metronomics Global Health Initiative, Marseille, France

3) INSERM UMR 911, Centre de Recherche en Oncologie biologique et en Oncopharmacologie, Aix-Marseille University, Faculty of Pharmacy, Marseille, France

4) Hematology and Pediatric Oncology Department, La Timone University Hospital of Marseille, France

5) Australian Centre for Nanomedicine, University of New South Wales, NSW, 2051, Australia

**Corresponding author:** Maria Kavallaris PhD

E-mail: [m.kavallaris@ccia.unsw.edu.au](mailto:m.kavallaris@ccia.unsw.edu.au)

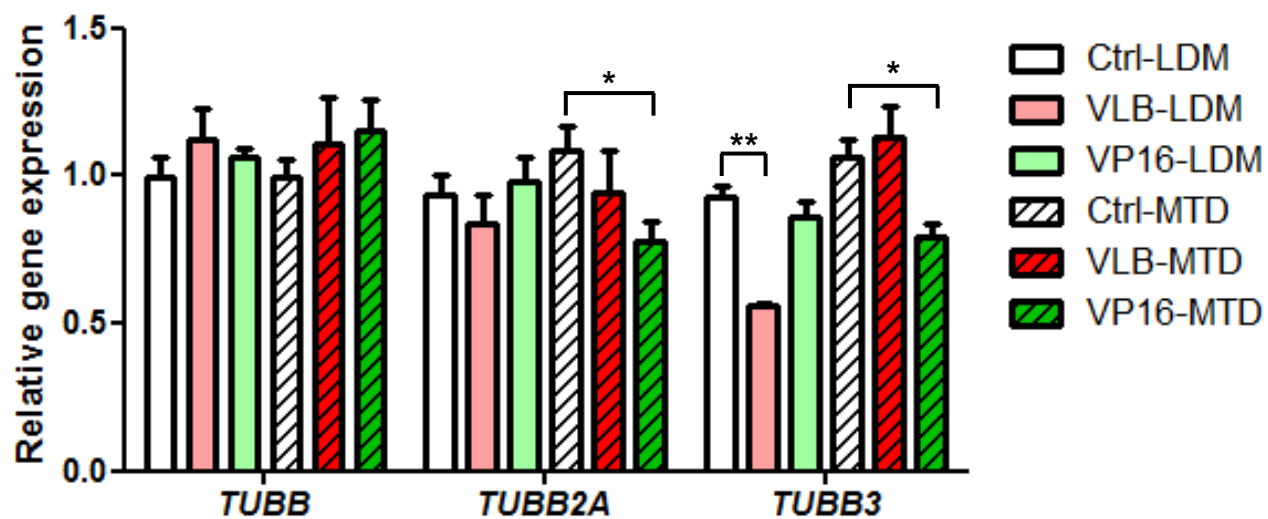

Supplement: 10456_2012_9321_MOESM2_ESM.pdf [file 10456_2012_9321_MOESM2_ESM.pdf]
